# Supplementary material for: Ski mediates TGF-β1-induced fibrosarcoma cell proliferation and promotes tumor growth
Source: PubMed Central journal article supplement (PMC7477421; doi:10.7150/jca.46074), 2020-08-14
Supplement: jcav11p5929s1.pdf [file jcav11p5929s1.pdf]

**Fig. S1**

**A**

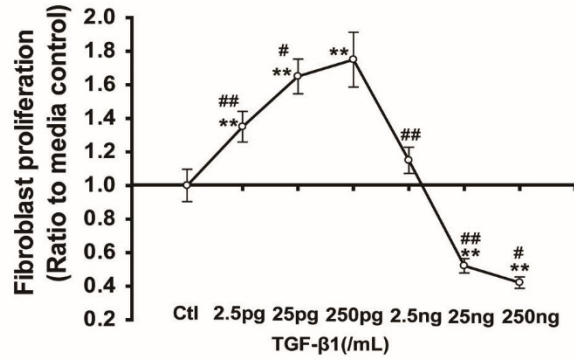

**C**

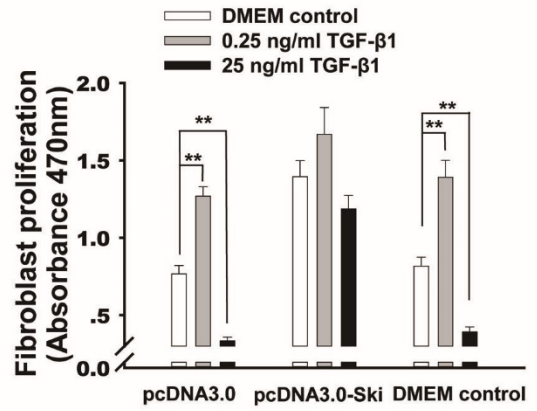

**B**

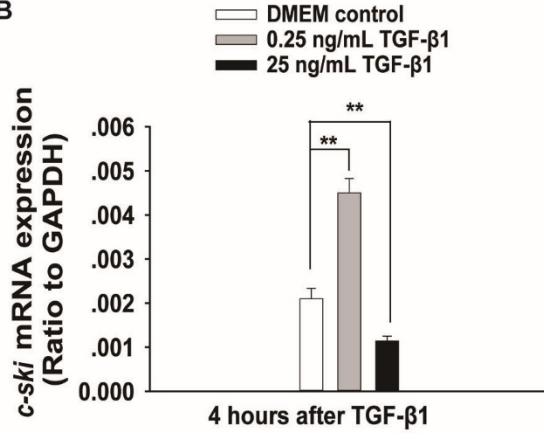

**D**

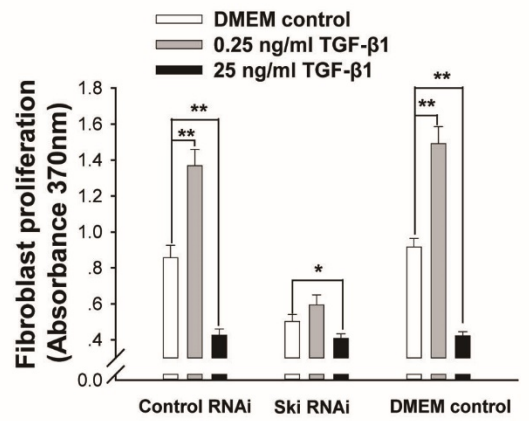

Fig. S2

A

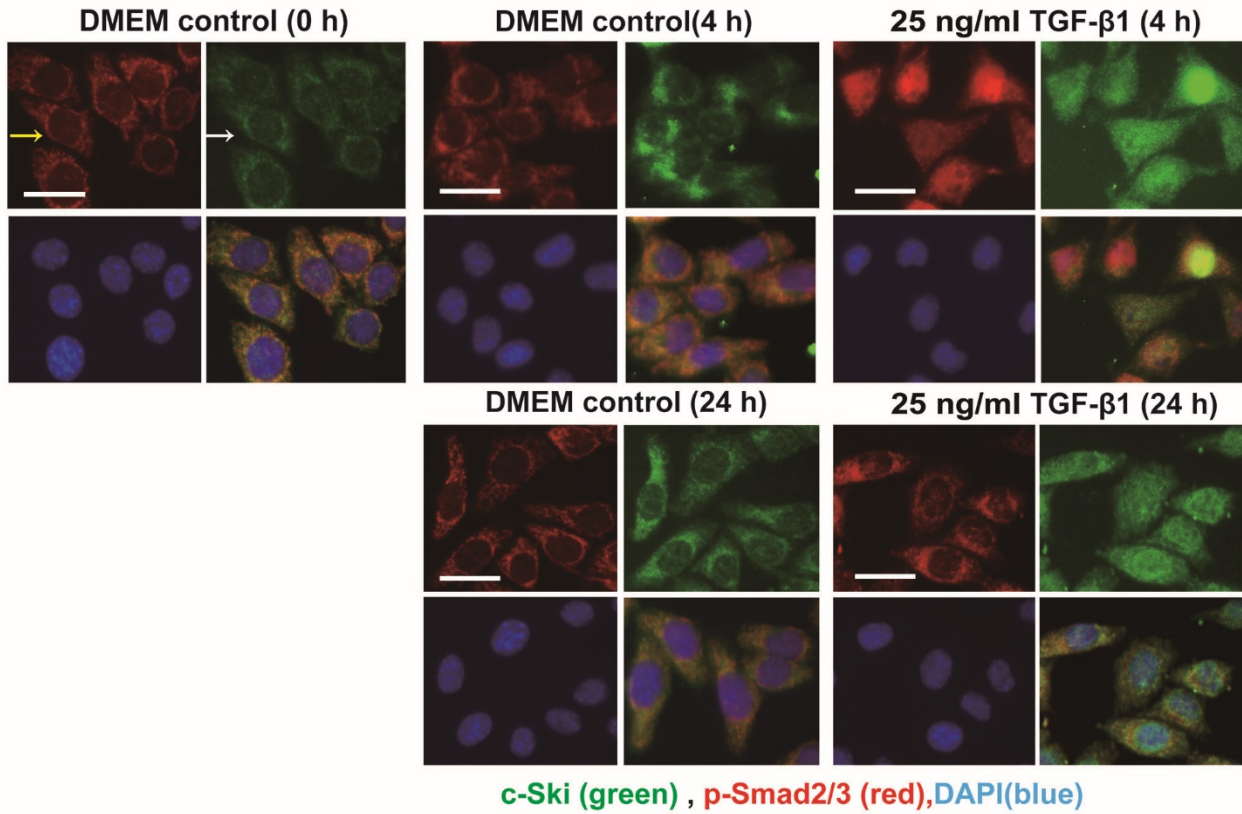

B

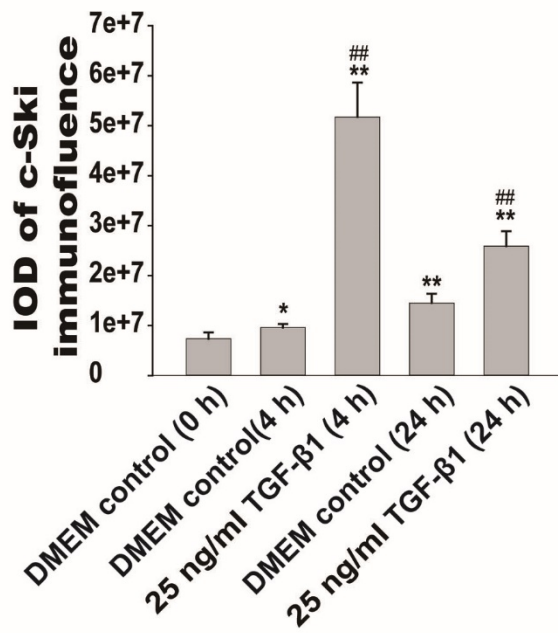

C

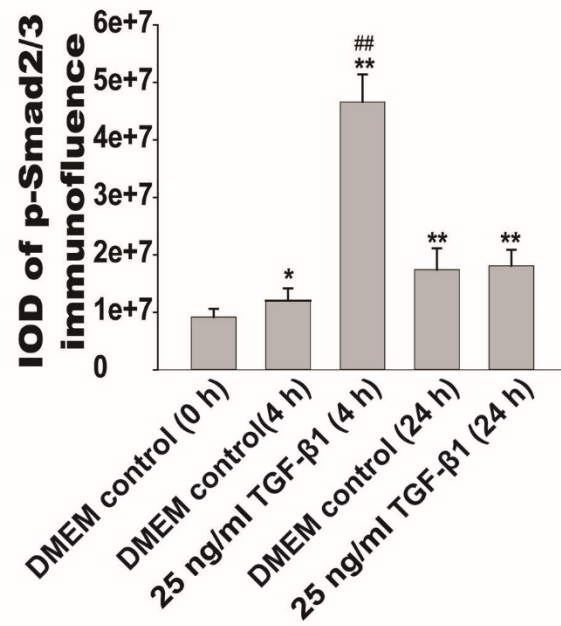

Fig. S3

A

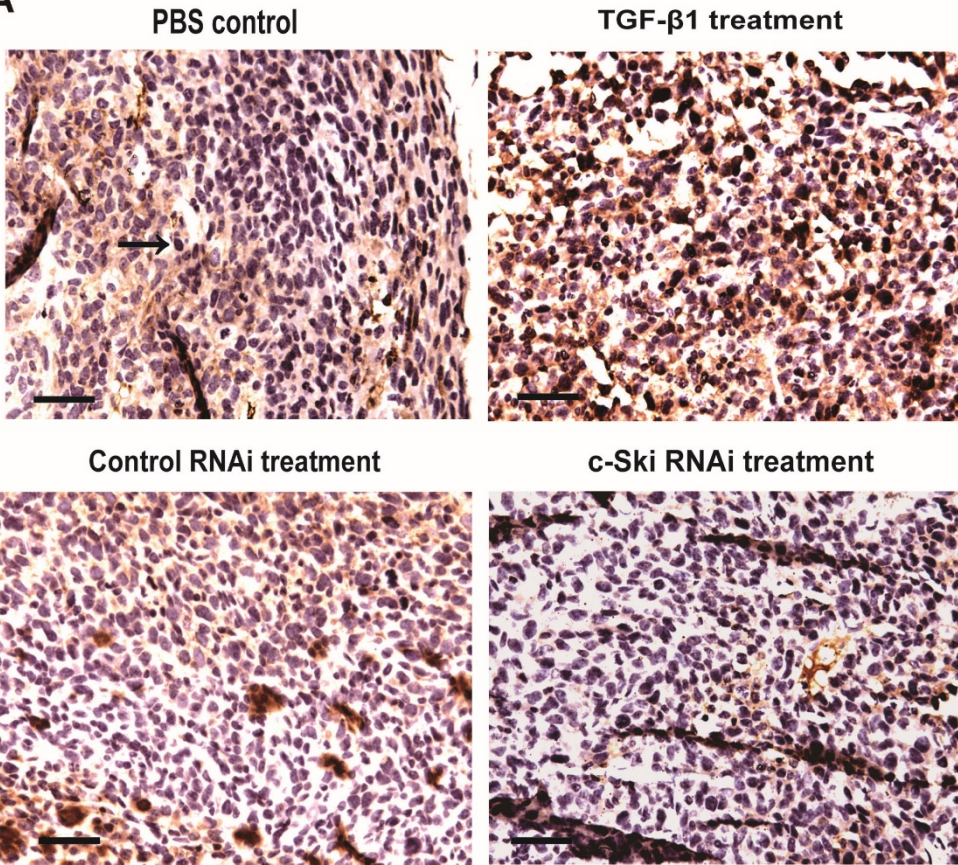

B

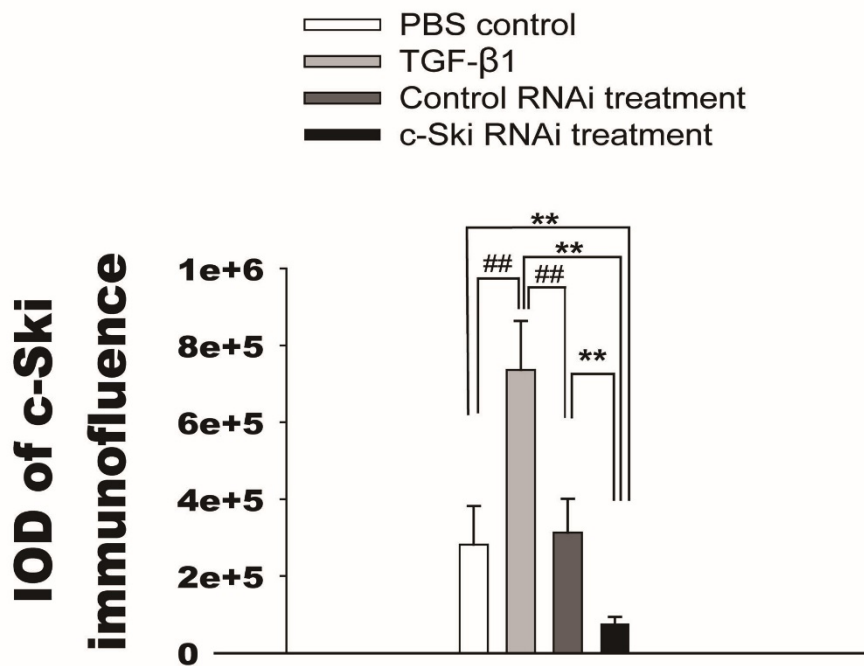

**Table SI** Summary of the clinicopathological variables for the dermatofibrosarcoma protuberans patients

| Cases | Sex    | Age | Site     | Primary/recurrent | Tumor differentiation | The Ski expression |
|-------|--------|-----|----------|-------------------|-----------------------|--------------------|
| 1     | male   | 39  | buttock  | P                 | low                   | 2+                 |
| 2     | female | 50  | thigh    | R                 | high                  | 1+                 |
| 3     | male   | 29  | Shoulder | P                 | low                   | 1+                 |
| 4     | male   | 50  | chest    | R                 | Moderate              | 2+                 |
| 5     | female | 65  | neck     | R                 | low                   | 2+                 |
| 6     | female | 23  | chest    | R                 | high                  | 1+                 |
| 7     | male   | 50  | abdomen  | P                 | high                  | -                  |
| 8     | male   | 77  | back     | R                 | low                   | 1+                 |
| 9     | female | 43  | abdomen  | R                 | Moderate              | 2+                 |
| 10    | female | 38  | waist    | P                 | high                  | 1+                 |
| 11    | male   | 12  | back     | P                 | low                   | 2+                 |
| 12    | male   | 43  | head     | P                 | high                  | -                  |
| 13    | female | 58  | back     | P                 | Moderate              | 1+                 |
| 14    | male   | 27  | abdomen  | R                 | low                   | 1+                 |
| 15    | male   | 38  | Shoulder | P                 | low                   | 1+                 |
| 16    | female | 22  | abdomen  | R                 | Moderate              | 1+                 |
| 17    | male   | 53  | abdomen  | R                 | Moderate              | 3+                 |

---

|           |        |    |         |   |          |           |
|-----------|--------|----|---------|---|----------|-----------|
| <b>18</b> | female | 37 | abdomen | P | low      | <b>1+</b> |
| <b>19</b> | male   | 36 | neck    | R | low      | <b>2+</b> |
| <b>20</b> | male   | 43 | abdomen | R | high     | <b>1+</b> |
| <b>21</b> | female | 27 | arm     | R | Moderate | <b>1+</b> |
| <b>22</b> | male   | 26 | leg     | P | low      | <b>3+</b> |
| <b>23</b> | female | 61 | chest   | R | low      | <b>3+</b> |
| <b>24</b> | male   | 59 | abdomen | P | Moderate | <b>2+</b> |
| <b>25</b> | male   | 70 | buttock | P | low      | <b>2+</b> |

---

**Table SII** Multivariate logistic regression analysis

| <b>Model Summary</b>             |                   |                 |       |
|----------------------------------|-------------------|-----------------|-------|
| Cox & Snell square               | Nagelkerke square | McFadden square |       |
| 0.489                            | 0.557             | 0.319           |       |
| <b>Likelihood Ratio Test</b>     |                   |                 |       |
|                                  | chi square        | Df              | p     |
| Age                              | 0.050             | 2               | 0.975 |
| Sex                              | 2.117             | 2               | 0.347 |
| Primary or Recurrence            | 1.796             | 2               | 0.407 |
| The expression level of Ski      | 13.433            | 2               | 0.001 |
| <b>Variables in the equation</b> |                   |                 |       |
| a                                | Wald              | Df              | p     |
| Poor differentiation             |                   |                 |       |
| Age                              | 0.025             | 1               | 0.874 |
| Sex                              | 1.622             | 1               | 0.254 |
| Primary or Recurrence            | 1.558             | 1               | 0.261 |
| The expression level of Ski      | 611.931           | 1               | 0     |
| Moderate differentiation         |                   |                 |       |
| Age                              | 0.047             | 1               | 0.823 |
| Sex                              | 1.668             | 1               | 0.693 |
| Primary or Recurrence            | 1.596             | 1               | 0.660 |
| The expression level of Ski      | -                 | 1               | -     |

Note: a:Reference category(Well differentiation).
